# Supplementary material for: Square-planar rhodium(I) complexes with aromatic bent terdentate nitrogen ligands as candidates for rod-like extended materials †
Source: Royal Society of Chemistry journal article supplement (doi:10.1039/b009051o), 2001-01-01
Supplement: b009051o.doc [file b009051o.doc]

**Square-planar rhodium(I) complexes with aromatic bent terdentate nitrogen ligands as candidates for rod-like extended materials.**

________________________________________________________________________________

Jean-Marc Benech, Claude Piguet, Gérald Bernardinelli, Jean-Claude G. Bünzli and Gérard Hopfgartner

**Supplementary data available**

Table S1 Selected bond distances (Å) and angles (°) for L4.

Bond Distances (Å)

________________________________________________________________________________

| N1-C1 1.341(2) | N1-C5 1.347(2) |
| --- | --- |
| N2-C6 1.323(2) | N2-C7 1.392(2) |
| N3-C6 1.375(2) | N3-C12 1.378(2) |
| N3-C13 1.459(2) | N4-C14 1.327(2) |
| N4-C15 1.387(2) | N5-C14 1.381(2) |
| N5-C20 1.379(2) | N5-C21 1.463(2) |
| C1-C2 1.397(3) | C1-C14 1.473(2) |
| C2-C3 1.375(3) | C3-C4 1.383(3) |
| C4-C5 1.389(3) | C5-C6 1.475(2) |
| C7-C8 1.396(3) | C7-C12 1.401(3) |
| C8-C9 1.382(3) | C9-C10 1.401(3) |
| C10-C11 1.378(3) | C11-C12 1.400(3) |
| C15-C16 1.400(3) | C15-C20 1.401(3) |
| C16-C17 1.382(3) | C17-C18 1.398(3) |
| C18-C19 1.375(3) | C19-C20 1.395(3) |

Bond Angles (degrees)

________________________________________________________________________________

| C1-N1-C5 118.0(1) | C6-N2-C7 104.6(1) |
| --- | --- |
| C6-N3-C12 106.6(1) | C6-N3-C13 129.7(2) |
| C12-N3-C13 123.4(2) | C14-N4-C15 105.2(1) |
| C14-N5-C20 106.4(1) | C14-N5-C21 131.4(1) |
| C20-N5-C21 122.2(1) | N1-C1-C2 122.3(2) |
| N1-C1-C14 118.4(1) | C2-C1-C14 119.3(2) |
| C1-C2-C3 119.0(2) | C2-C3-C4 119.3(2) |
| C3-C4-C5 118.5(2) | N1-C5-C4 122.8(2) |
| N1-C5-C6 116.9(1) | C4-C5-C6 120.3(2) |
| N2-C6-N3 113.1(1) | N2-C6-C5 123.1(1) |
| N3-C6-C5 123.7(2) | N2-C7-C8 130.4(2) |
| N2-C7-C12 110.0(2) | C8-C7-C12 119.4(2) |
| C7-C8-C9 118.3(2) | C8-C9-C10 121.5(2) |
| C9-C10-C11 121.4(2) | C10-C11-C12 116.6(2) |
| N3-C12-C7 105.7(1) | N3-C12-C11 131.5(2) |
| C7-C12-C11 122.7(2) | N4-C14-N5 112.6(1) |
| N4-C14-C1 122.0(1) | N5-C14-C1 125.4(1) |
| N4-C15-C16 130.5(2) | N4-C15-C20 109.8(2) |
| C16-C15-C20 119.6(2) | C15-C16-C17 117.7(2) |
| C16-C17-C18 121.8(2) | C17-C18-C19 121.5(2) |
| C18-C19-C20 116.8(2) | N5-C20-C15 106.1(1) |
| N5-C20-C19 131.3(2) | C15-C20-C19 122.6(2) |

__________________________________________________________________

Table S2. Selected Least-Squares Plane Data for {[Rh(NBD)Cl]2L5} (2).

**deviations, Å**

__________________

**Least-squares planes description*a* max atom**

____________________________________________________________________________

**P1 Rh1, P1b, P2b, N2a, Cl1 0.05 Rh1
P2 P1b, P2b, N2a, Cl1 0.02 P2b
P3 Rh2, P1c, P2c, N4a, Cl2 0.04 P2c
P4 P1c, P2c, N4a, Cl2 0.04 P1c
P5 pyridine, N1a 0.005 C4a
P6 benzimidazole, N2a, N3a 0.02 C7a
P7 benzimidazole, N4a, N5a 0.01 C13a**

Interplane Angles (°)

|  | P2 | P3 | P4 | P5 | P6 | P7 |
| --- | --- | --- | --- | --- | --- | --- |
| P1 | 0.00(4) | 55.70(3) | 55.69(3) | 62.84(3) | 81.14(3) | 72.22(3) |
| P2 |  | 55.72(3) | 55.72(3) | 62.84(3) | 81.12(3) | 72.21(3) |
| P3 |  |  | 0.020(8) | 66.61(3) | 61.04(3) | 77.23(3) |
| P4 |  |  |  | 66.61(3) | 61.04(3) | 77.23(3) |
| P5 |  |  |  |  | 55.25(3) | 48.58(3) |
| P6 |  |  |  |  |  | 78.09(3) |

*a* P1i is the midpoint between the carbon atoms C2i and C3i, and P2i is the midpoint between the carbon atoms C5i and C6i (i = b, c).

Figure S1 Projection onto the ac plane of the herring-bone arrangement of the ligands in the crystal of L4 showing the stacked pairs formed along the c direction.


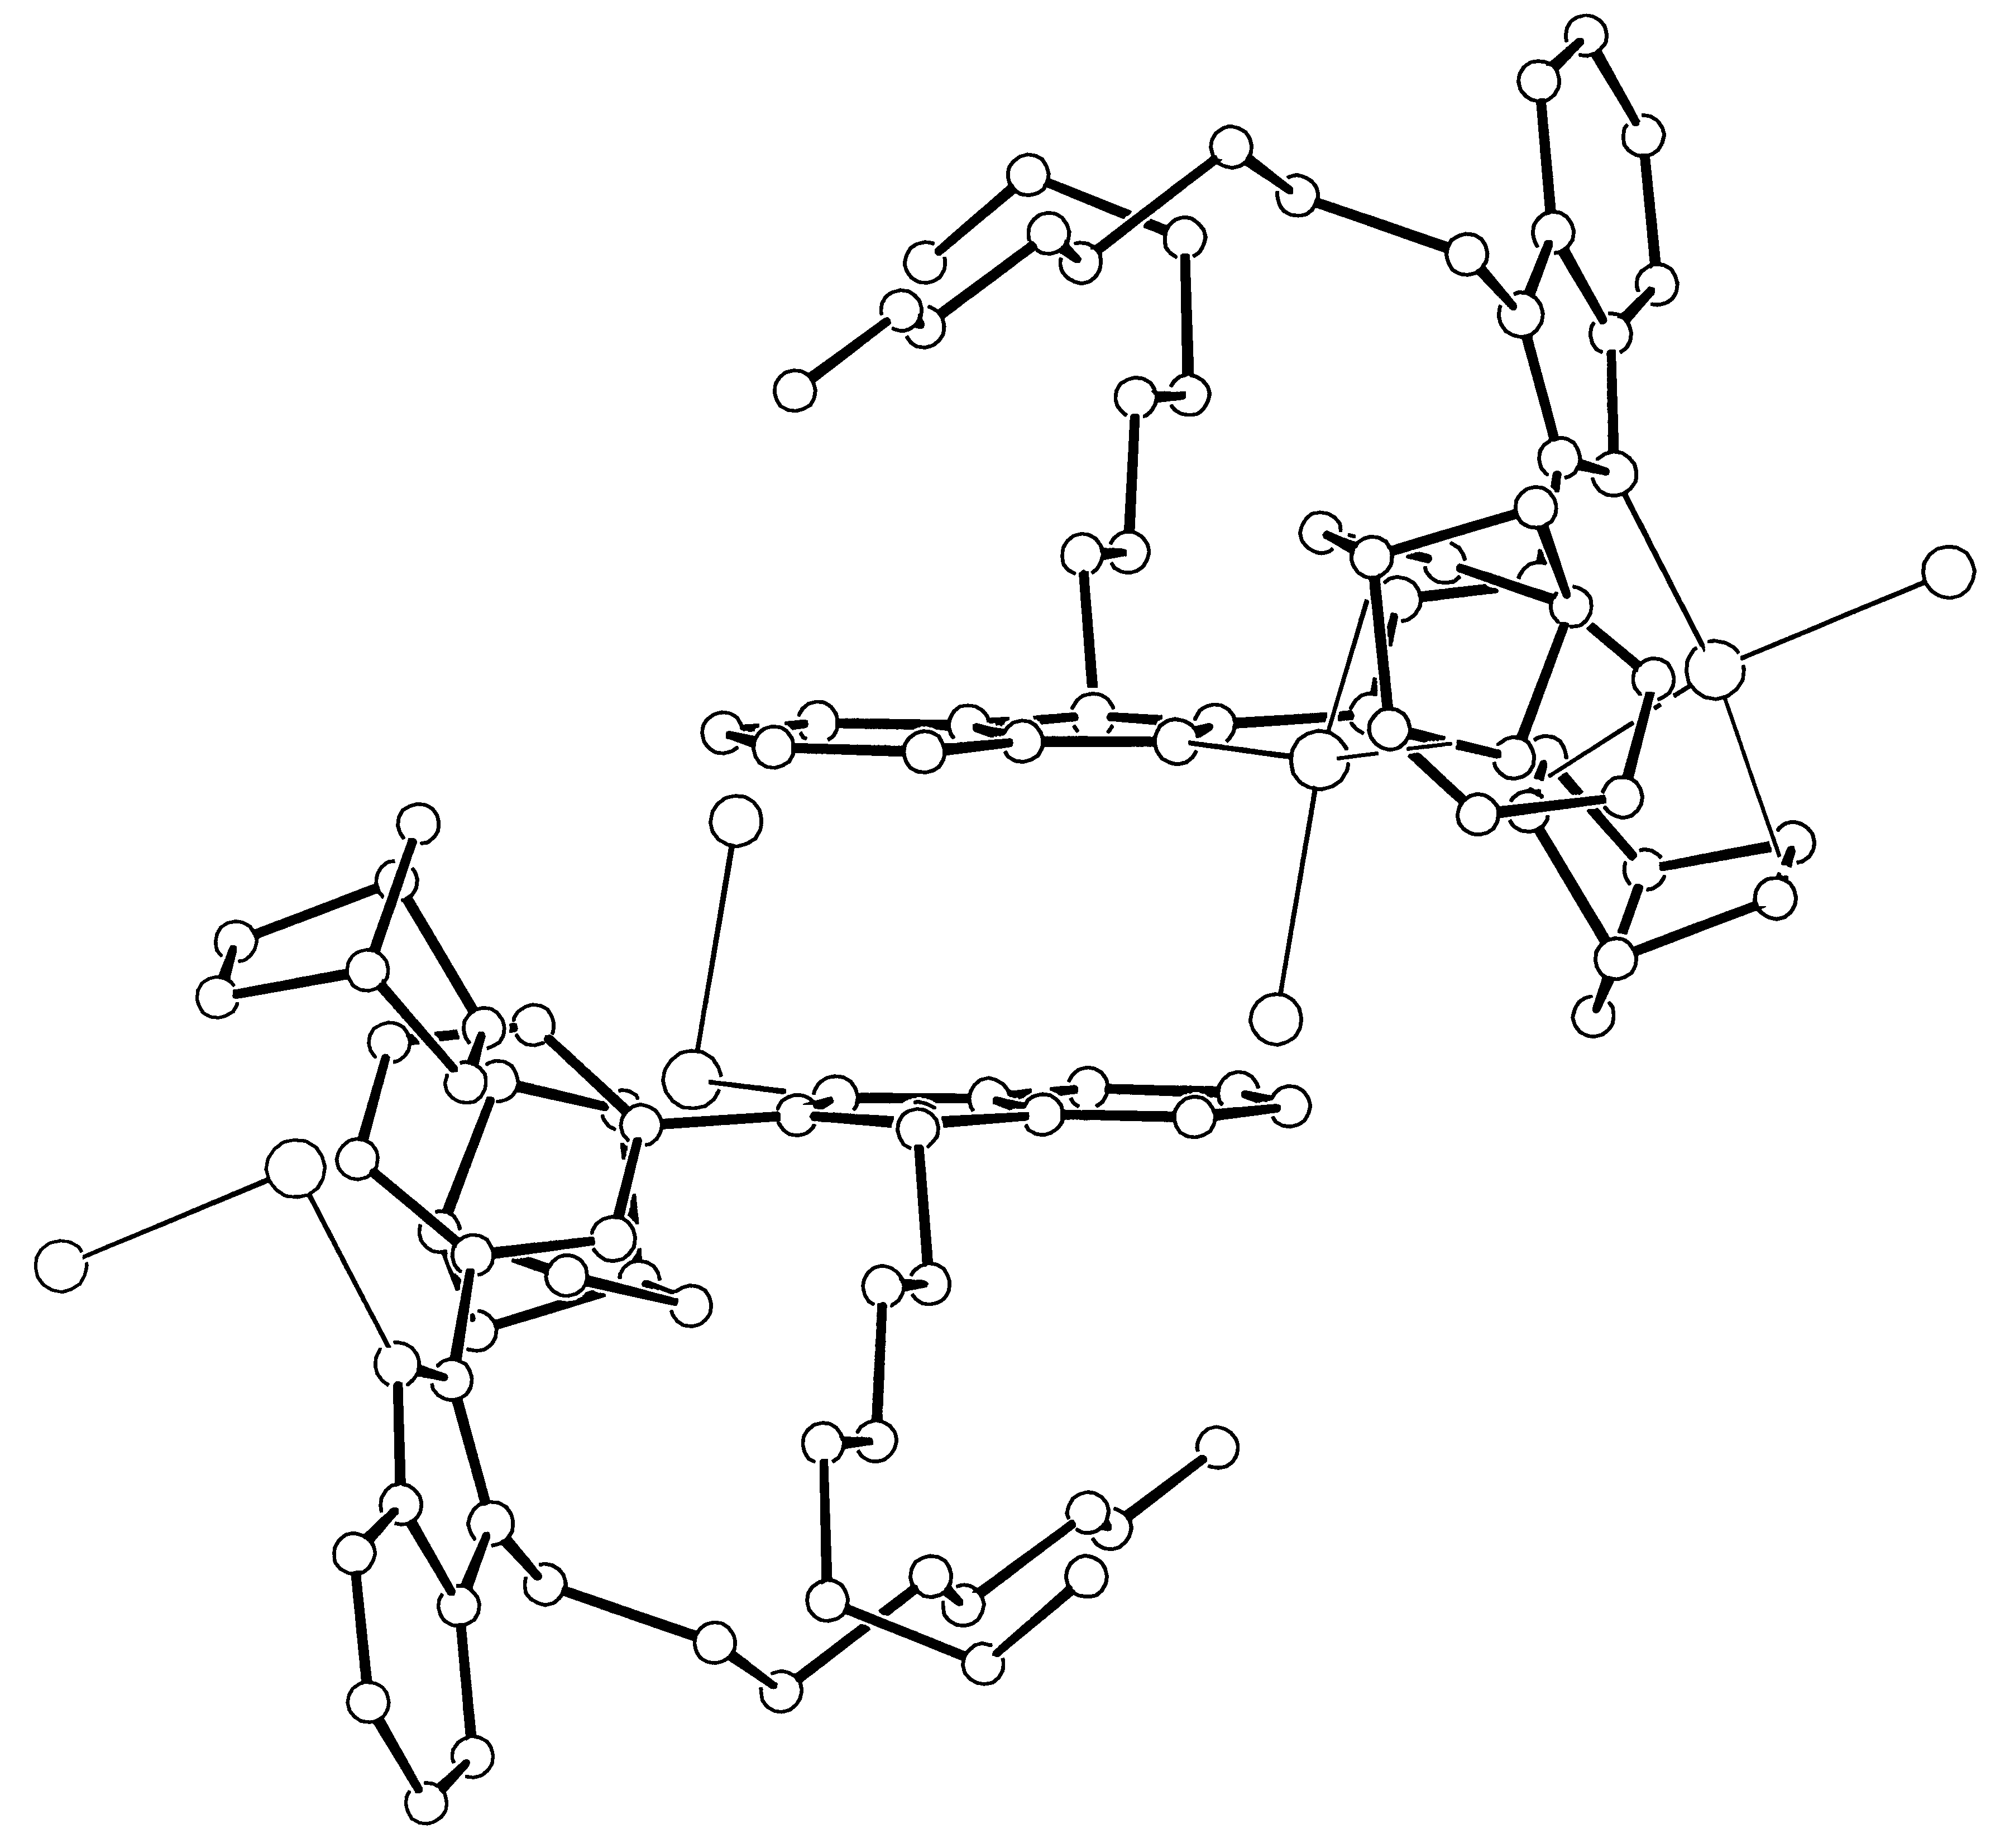


Figure S2 Perspective view of a loosely stacked pair of complex related by an inversion center in the crystal of 2.
